# Supplementary material for: Role of diversity-generating retroelements for regulatory pathway tuning in cyanobacteria
Source: PubMed Central journal article supplement (PMC7517822; doi:10.1186/s12864-020-07052-5), 2020-09-25
Supplement: 12864_2020_7052_MOESM6_ESM.pdf [file 12864_2020_7052_MOESM6_ESM.pdf]

STKII (Previous Literature)

DGR-VPs (This Dataset)

DGR-Remote VPs (This Dataset)

DGR-VP Paralogs (This Dataset)

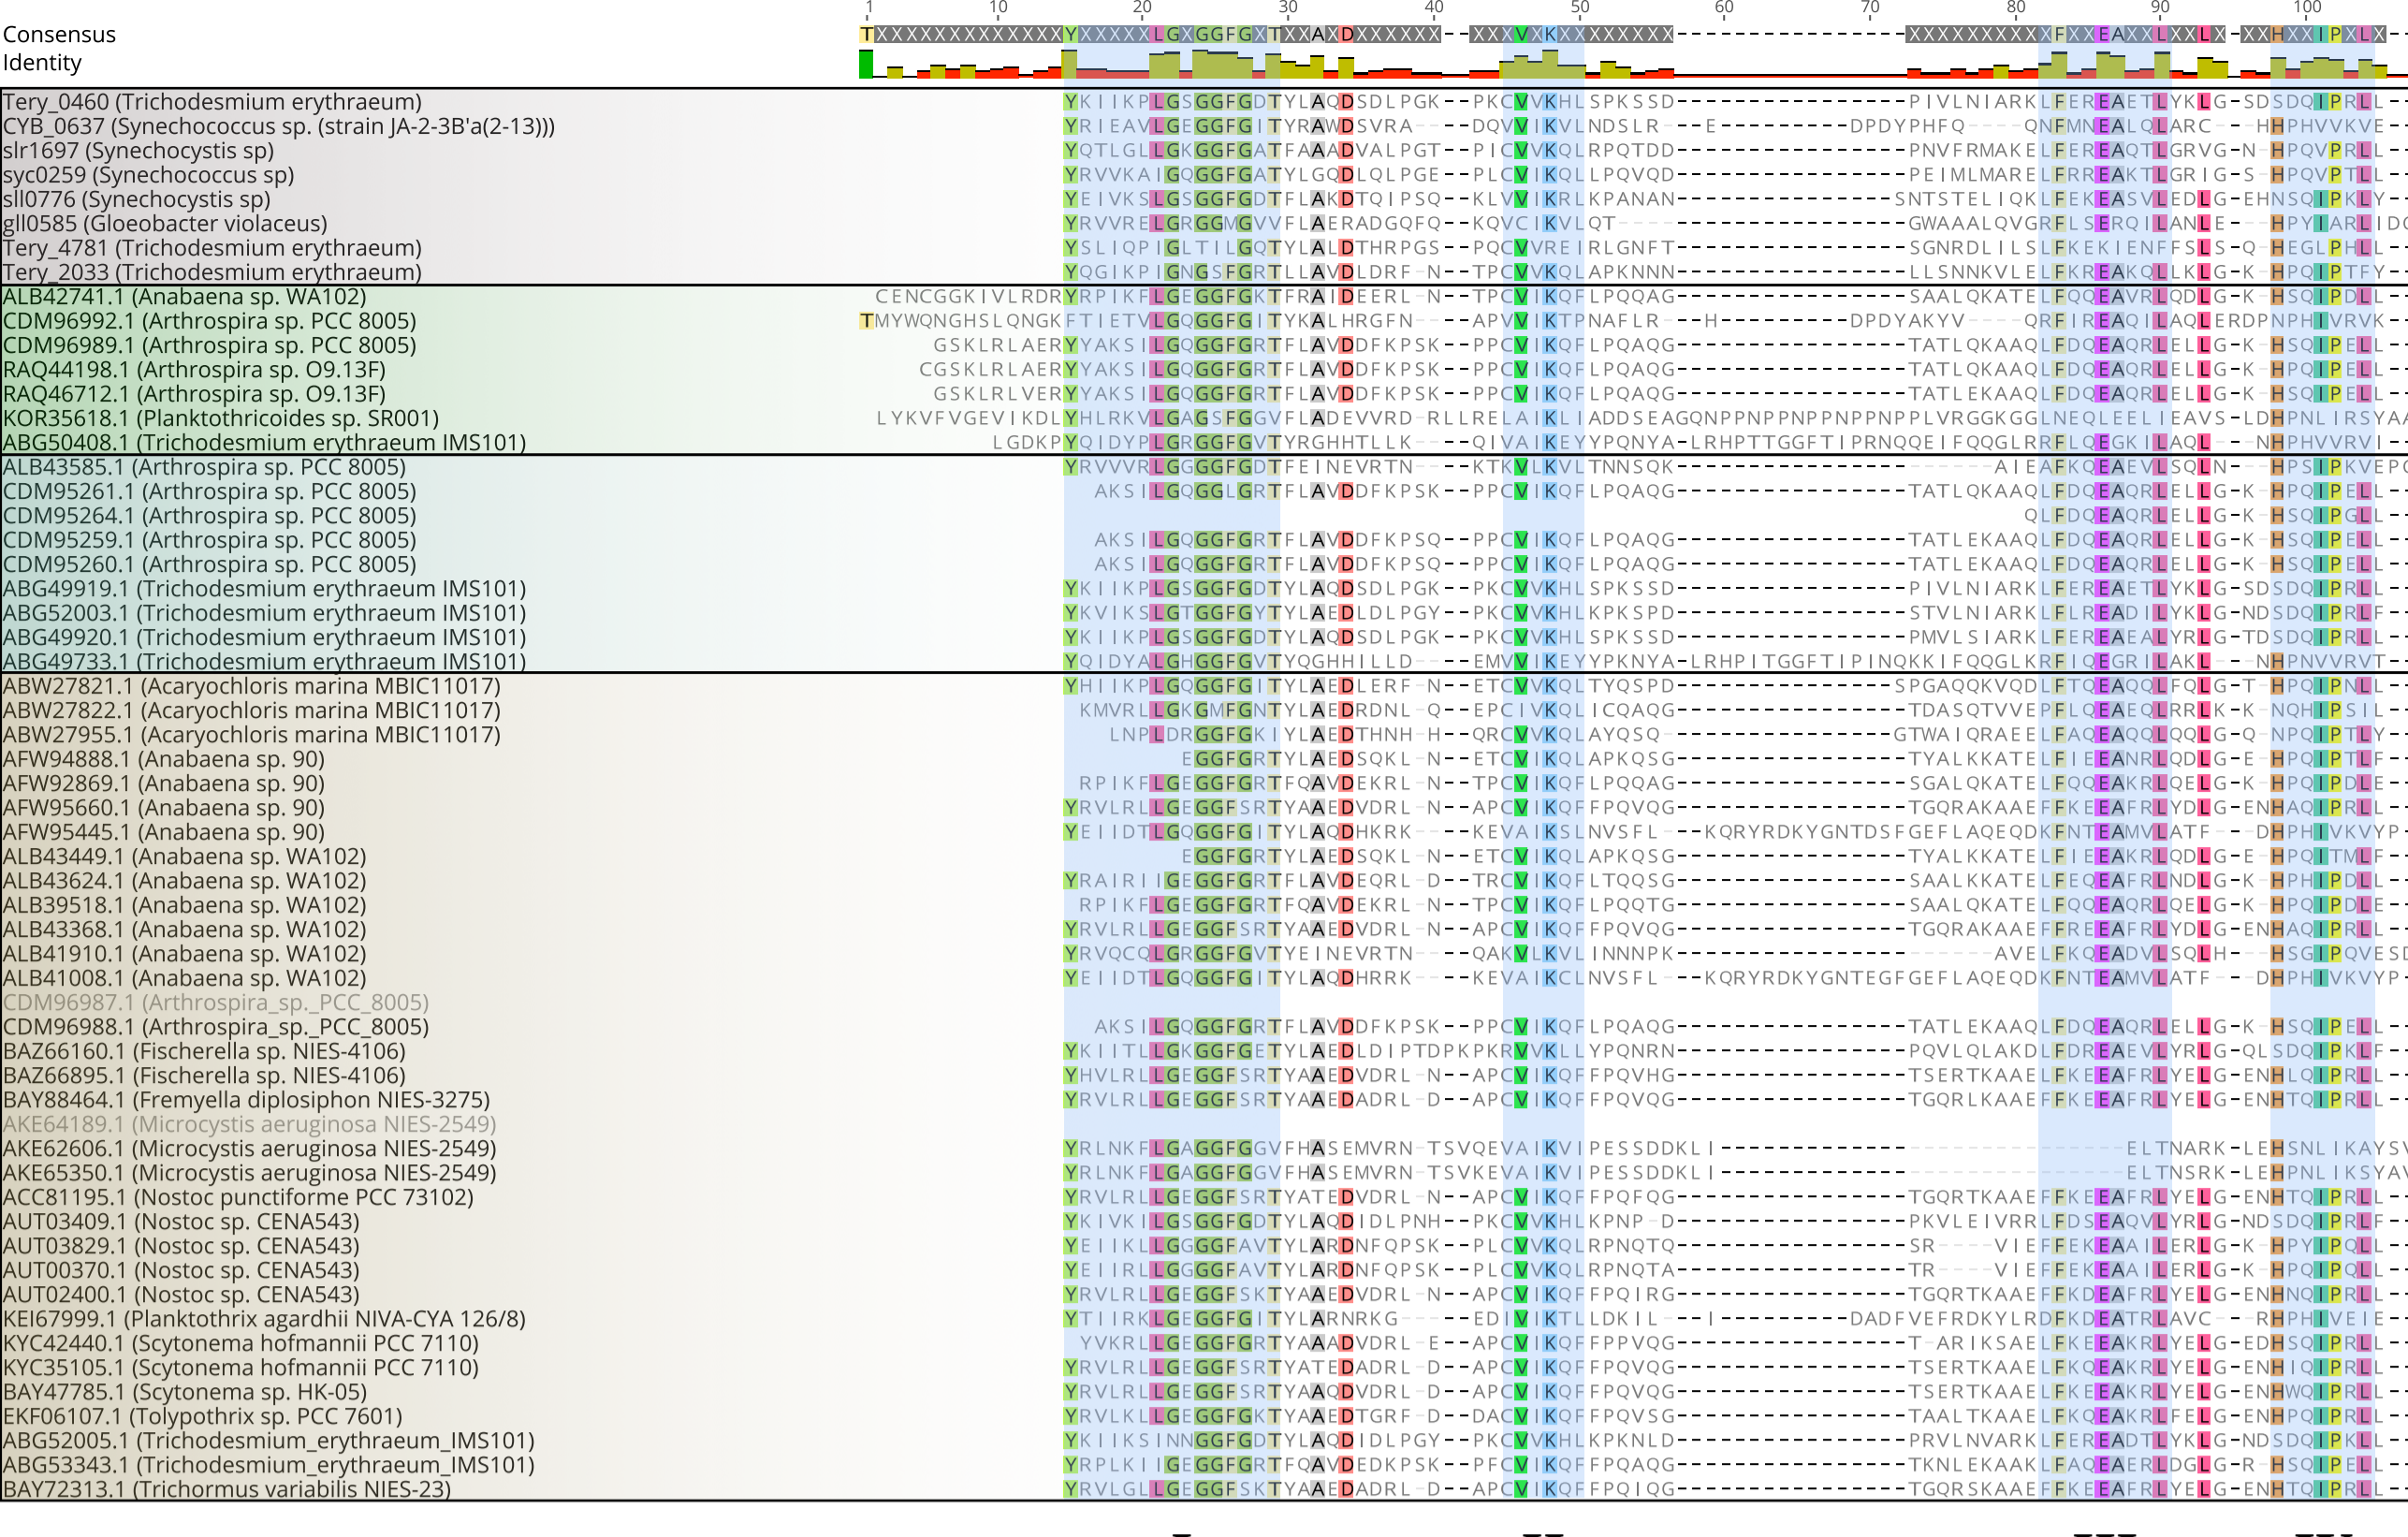

I II III IV

STKII (Previous Literature)

DGR-VPs (This Dataset)

DGR-Remote VPs (This Dataset)

DGR-VP Paralogs (This Dataset)

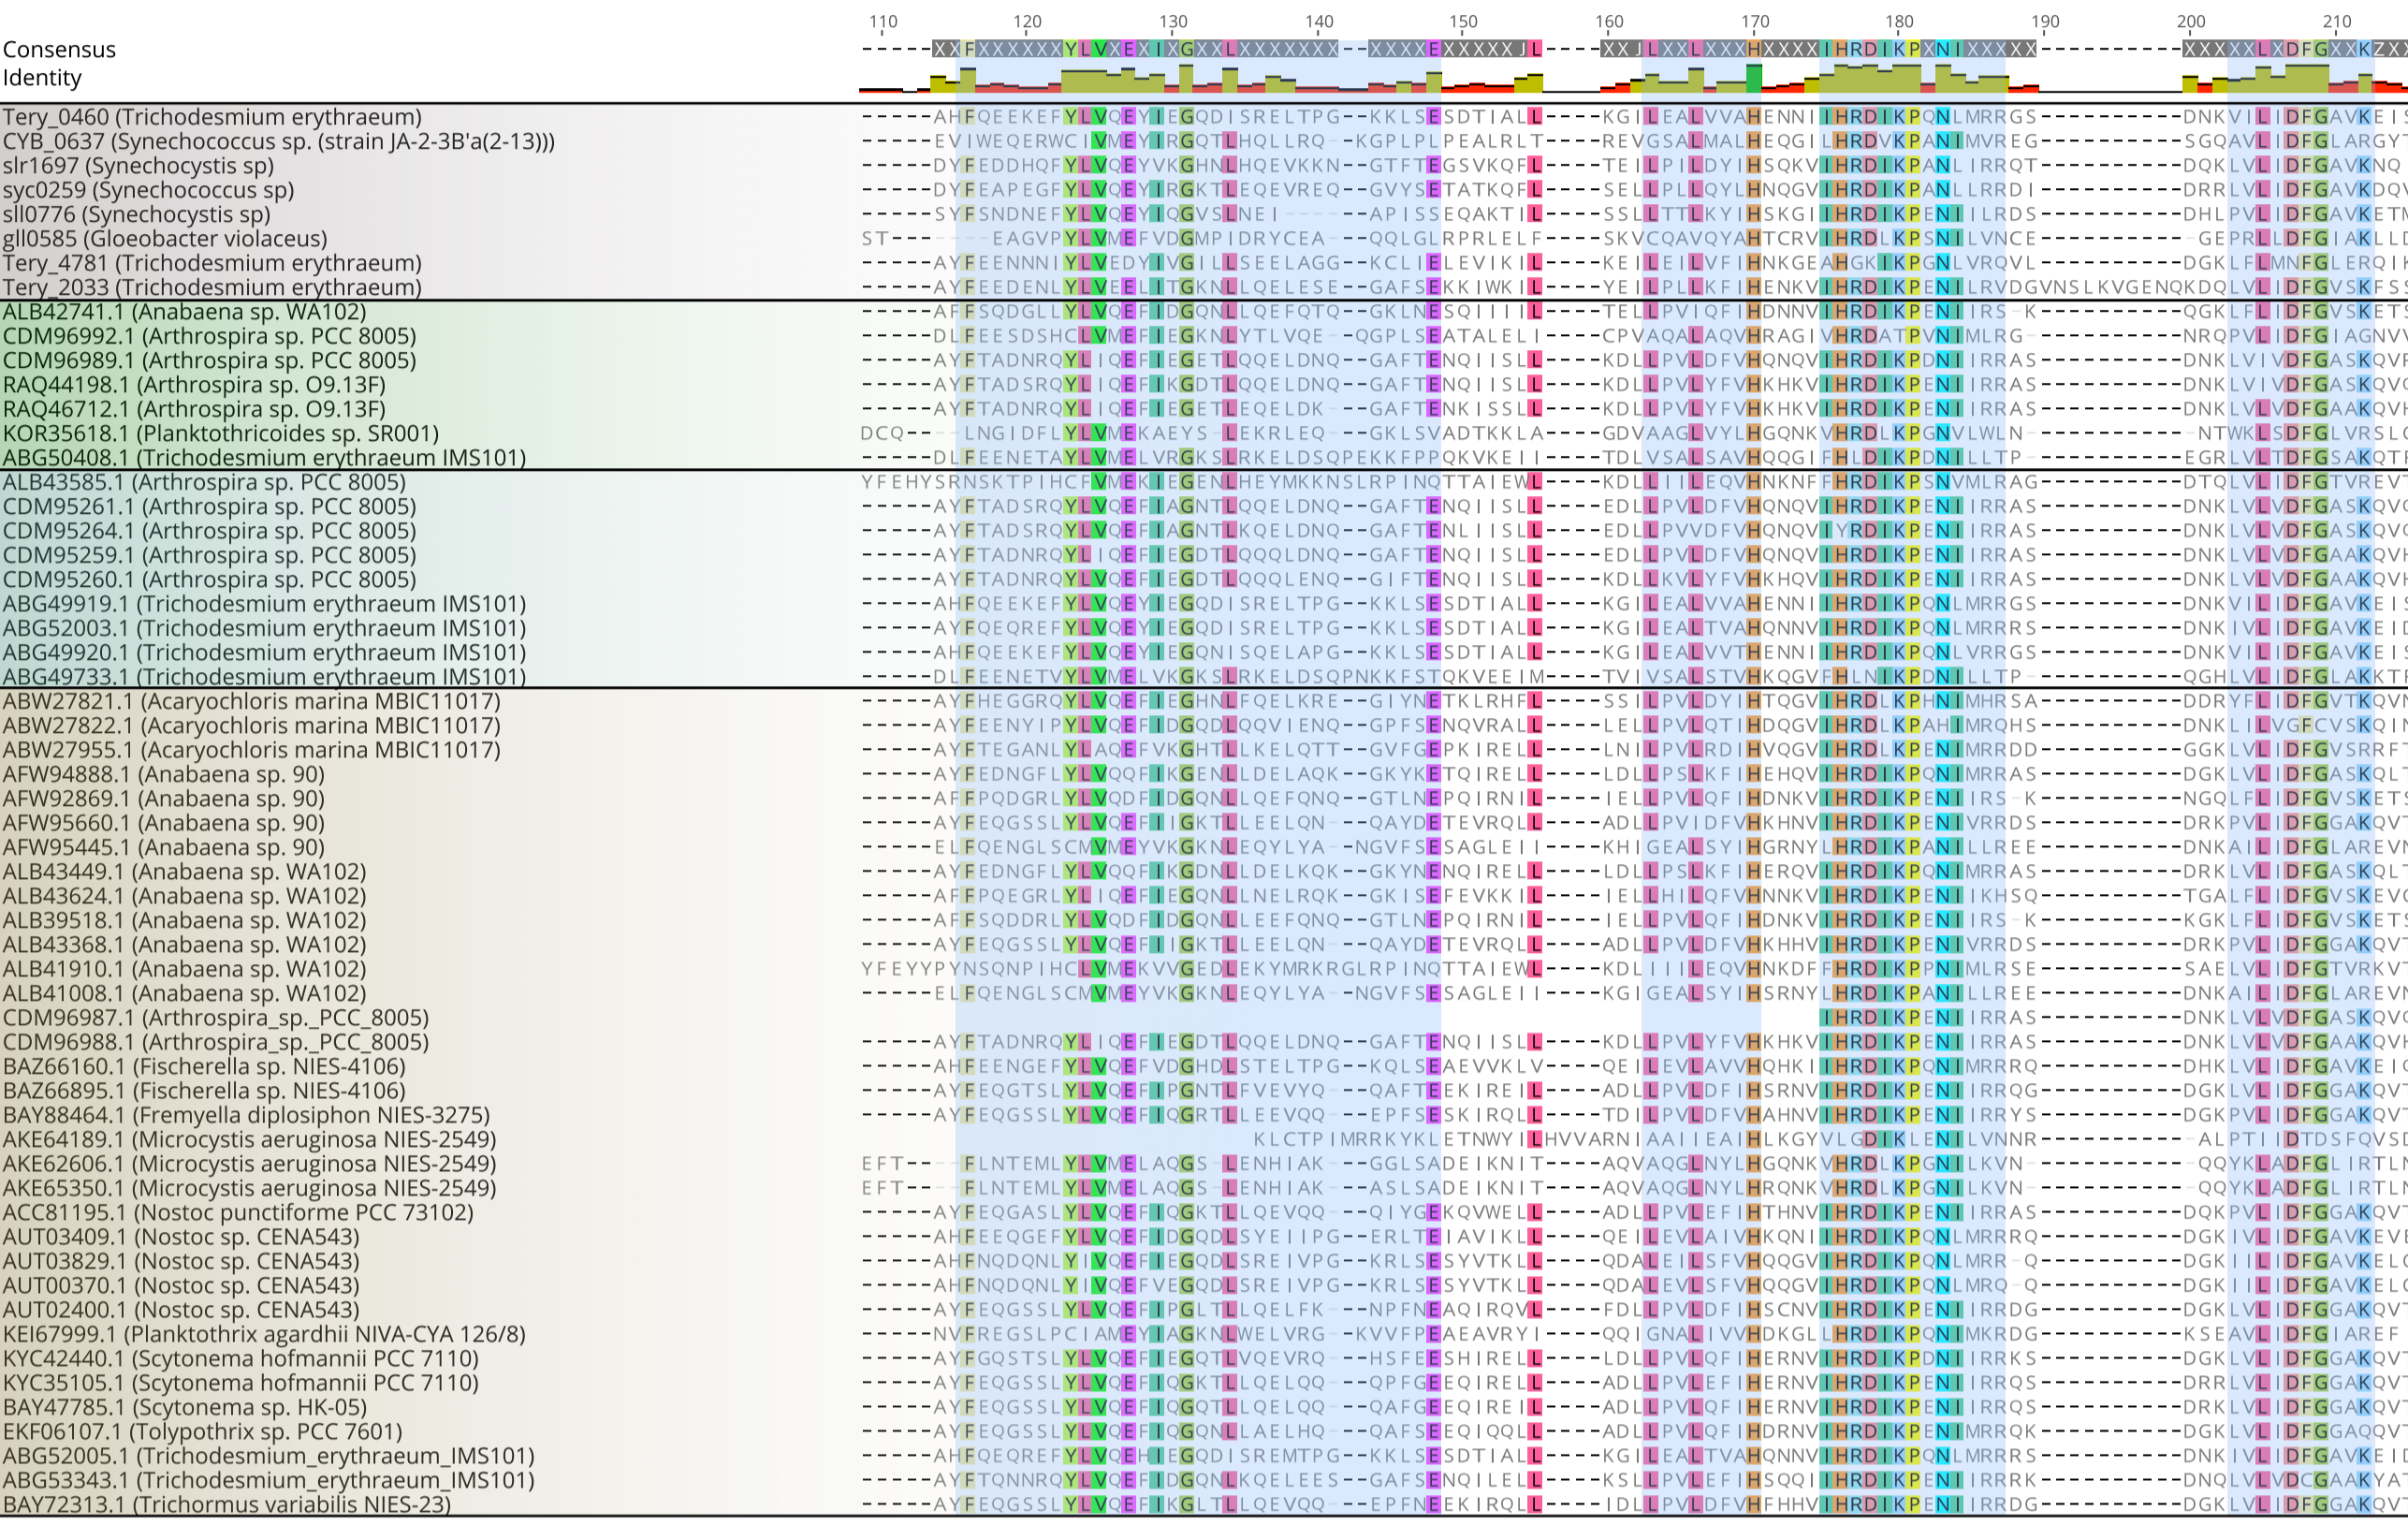

V VIa VIb VII

STKII (Previous Literature)

DGR-VPs (This Dataset)

DGR-Remote VPs (This Dataset)

DGR-VP Paralogs (This Dataset)

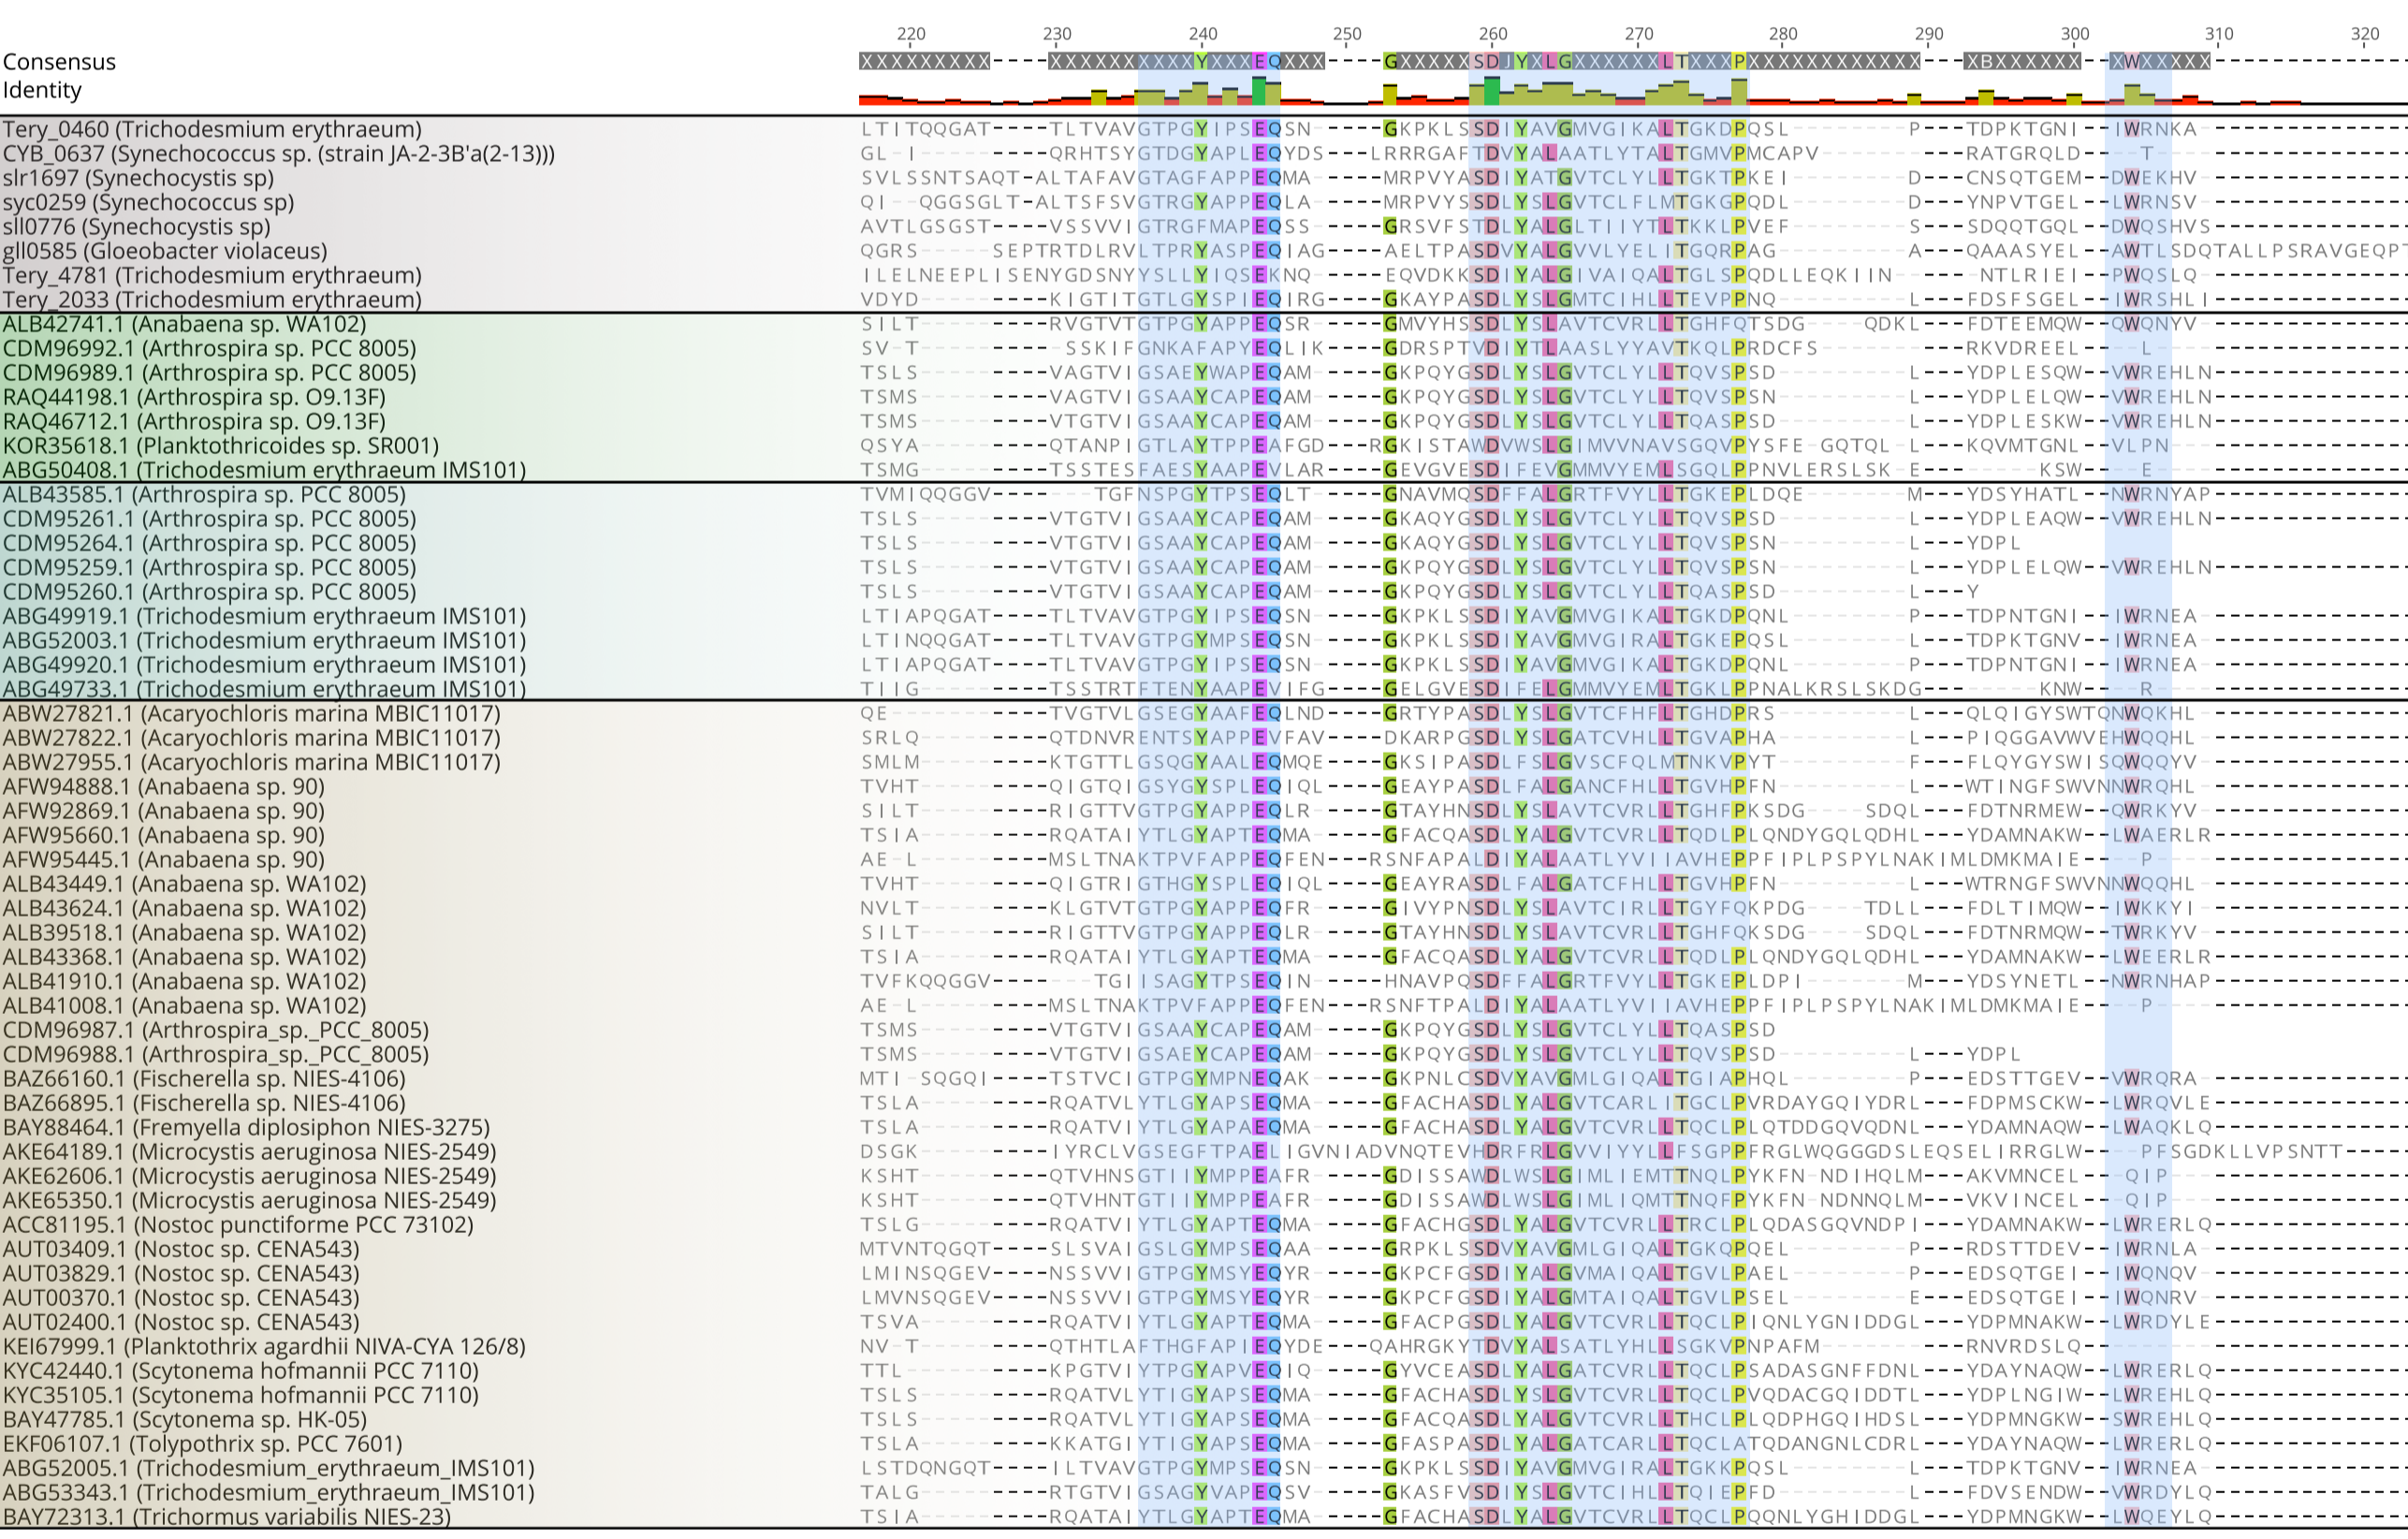

VIII IX X

STKII (Previous Literature)

DGR-VPs (This Dataset)

DGR-Remote VPs (This Dataset)

DGR-VP Paralogs (This Dataset)

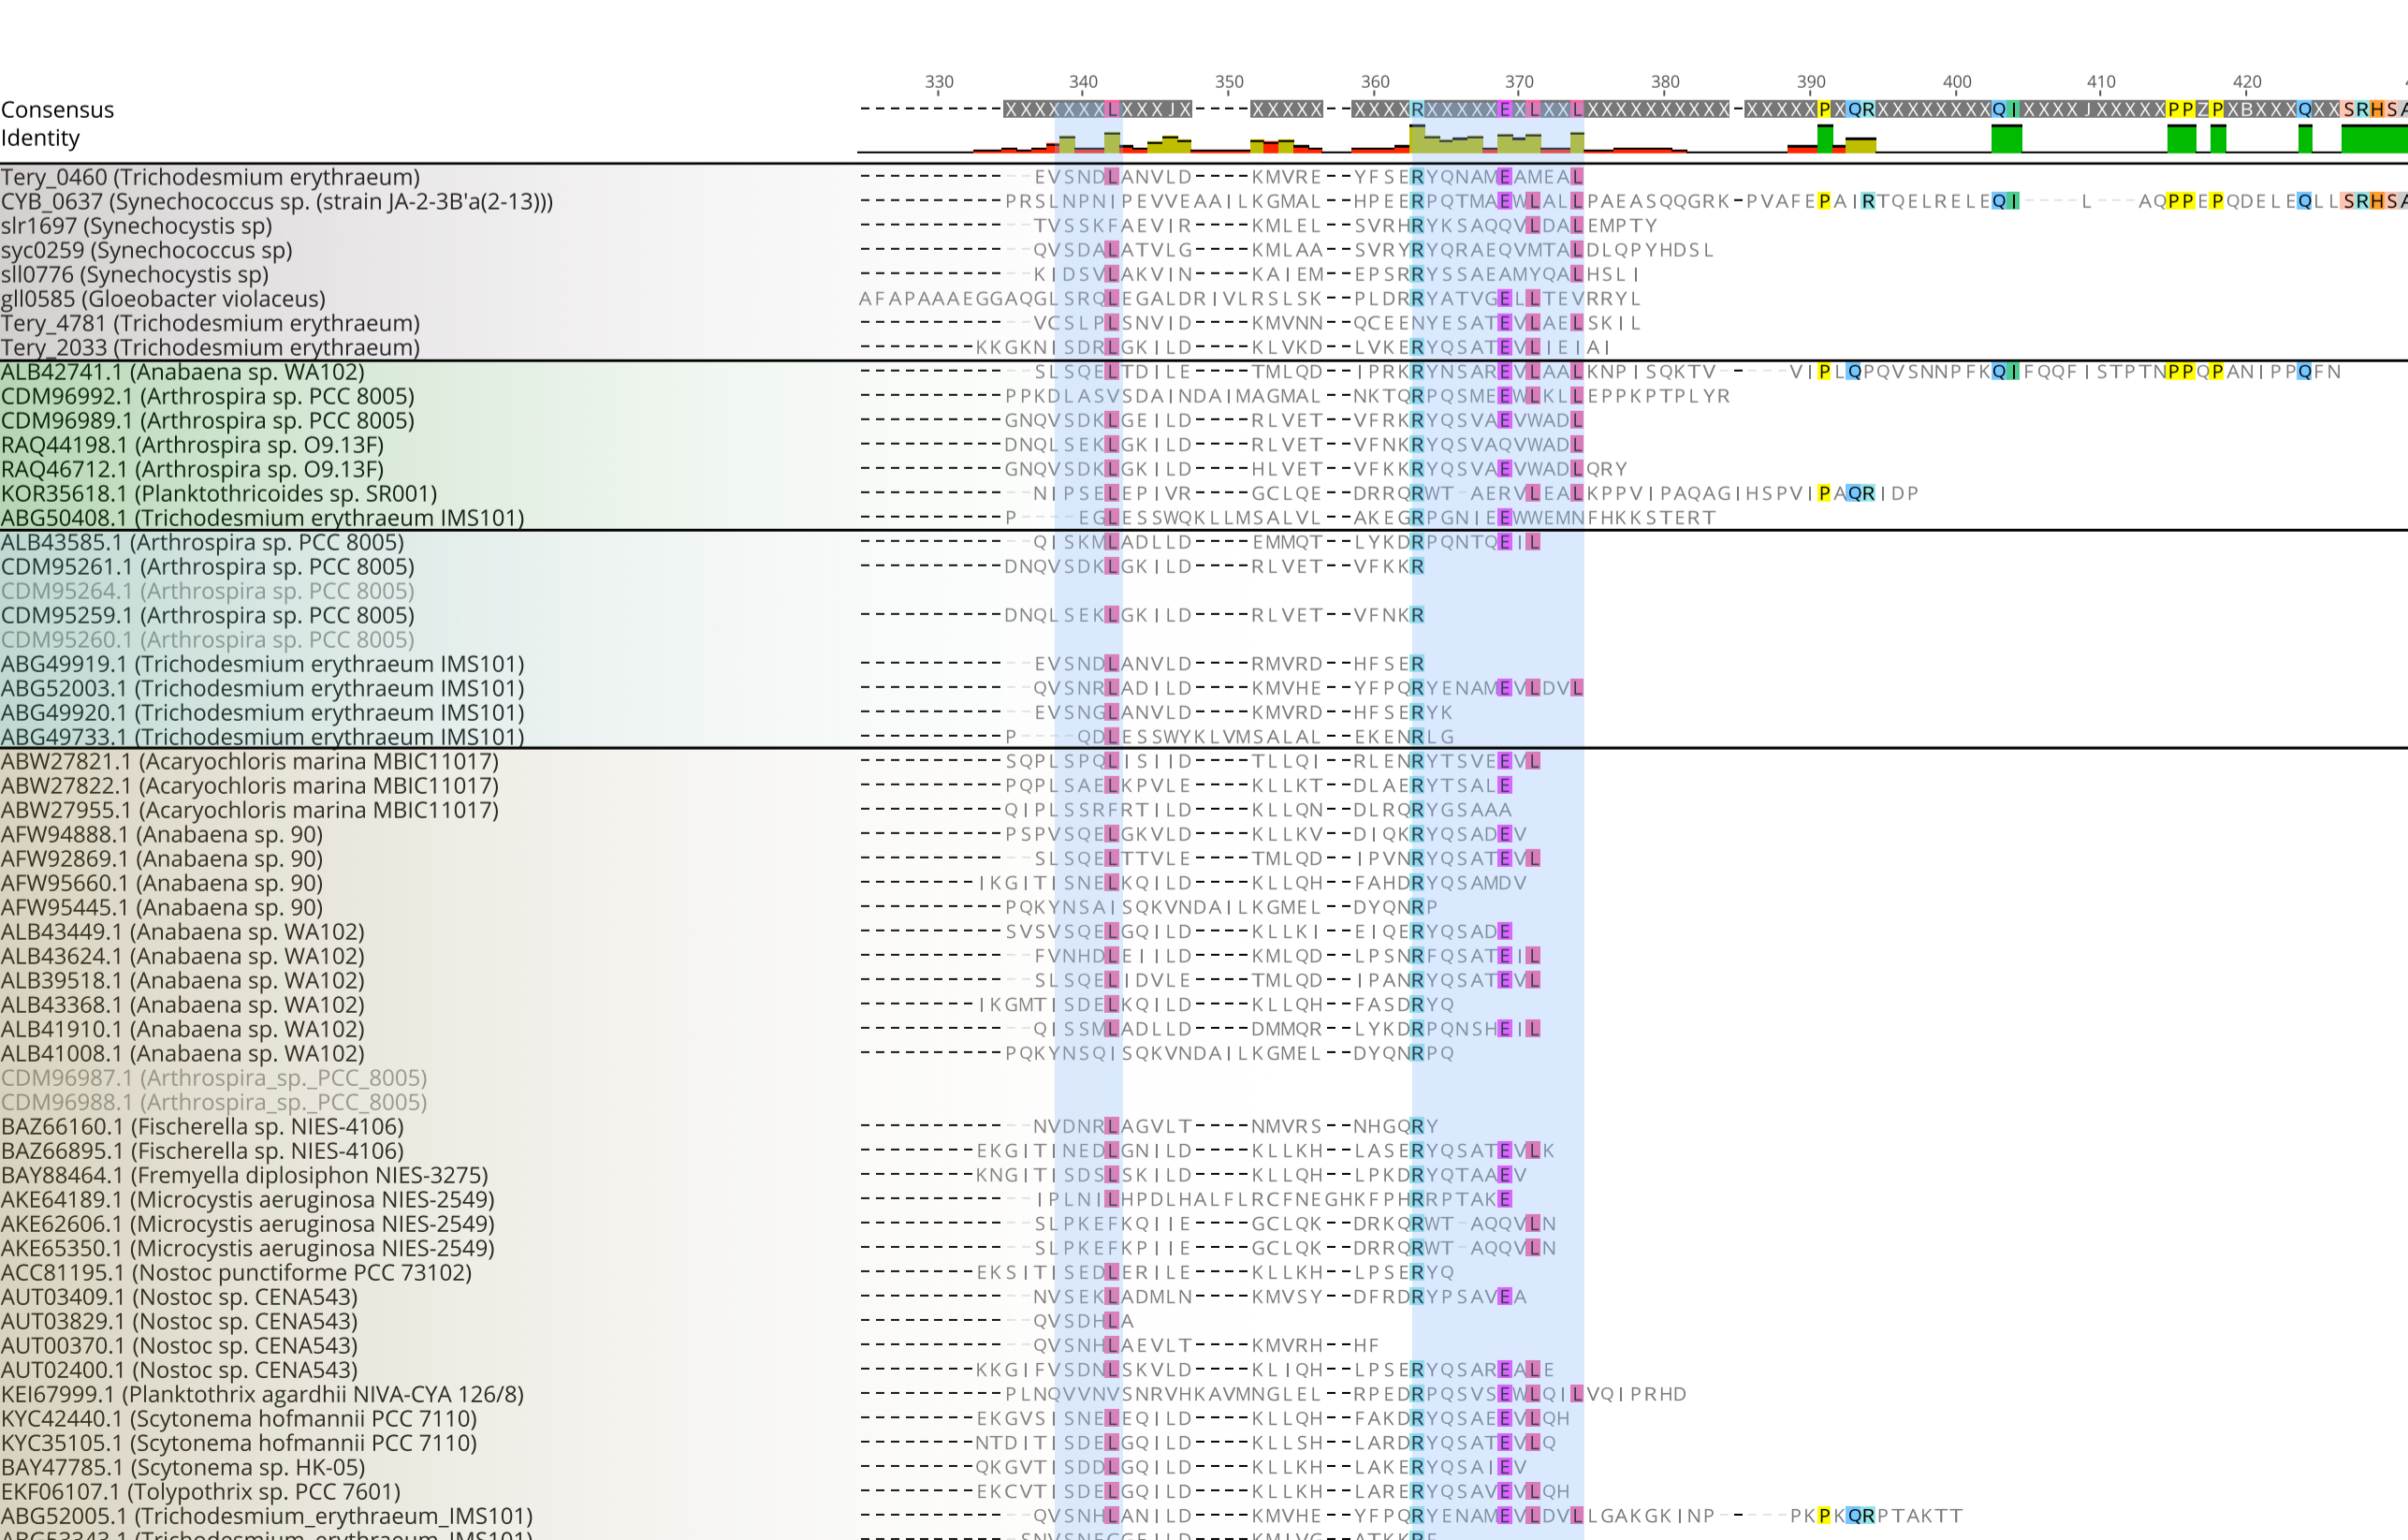

XI XII
